# Supplementary material for: Distinguishing between Decaffeinated and Regular Coffee by HS-SPME-GC×GC-TOFMS, Chemometrics, and Machine Learning
Source: MDPI journal article supplement (doi:10.3390/molecules27061806), 2022-03-10
Supplement: s1 [file s1]

## Supplementary Materials

# Distinguishing between Decaffeinated and Regular Coffee by HS-SPME-GC×GC-TOFMS, Chemometrics, and Machine Learning

Yun Zou <sup>1,\*,+</sup>, Meriem Gaida <sup>1,†</sup>, Flavio A. Franchina <sup>2</sup>, Pierre-Hugues Stefanuto <sup>1</sup> and Jean-François Focant <sup>1</sup>

<sup>1</sup> Organic and Biological Analytical Chemistry Group, MolSys Research Unit, University of Liège, 4000 Liège, Belgium; meriem.gaida@uliege.be (M.G.); phstefanuto@uliege.be (P.-H.S.); jf.focant@uliege.be (J.-F.F.)

<sup>2</sup> Department of Chemical, Pharmaceutical and Agricultural Sciences, University of Ferrara, 44121 Ferrara, Italy; flavioantonio.franchina@unife.it

\* Correspondence: y.zou@uliege.be or yun.zou.titech@gmail.com

† These authors contributed equally to this work.

### Contents

**Table S1.** The top 20 discriminatory features selected using the random forest algorithm.

**Table S2.** The analytical conditions of HS-SPME-GC×GC-TOFMS.

**Figure S1.** PCA score plots of the decaffeinated coffee samples.

**Figure S2.** The correlation matrix between the top 20 features.

**Figure S3.** The ROC curve of the validation set ( $n=30$ ) generated by using the Random forest algorithm.

**Figure S4.** The 2D chromatogram of the coffee sample R-R.

**Table S1.** The top 20 discriminatory features selected using the random forest algorithm.

| Feature N° | Name                                       | CAS N°     | Similarity/reverse similarity/probability | Library | Aroma/flavor profile                 | Chemical family      |
|------------|--------------------------------------------|------------|-------------------------------------------|---------|--------------------------------------|----------------------|
| 1          | 1-Dodecanol,3,7,11-trimethyl-              | 6750-34-1  | 501/523/12.64                             | Replib  | -                                    | Alcohols             |
| 2          | 2-Acetyl-4-methylthiazole                  | 7533-07-5  | 684/890/59.23                             | Wiley9  | Nutty                                | Thiazoles            |
| 3          | 2-methyl-5H-6,7-dihydrocyclopentapyrazine  | 23747-46-8 | 861/861/46.07                             | Wiley9  | -                                    | Pyrazines            |
| 4          | Furfurylmethyl disulfide                   | 57500-00-2 | 852/852/45.55                             | Wiley9  | Broth-like, aromatic, roasted, fatty | Furans               |
| 5          | 4,4-Ethylenedioxy-1-pentylamine            | 66442-97-5 | 568/647/25.18                             | Mainlib | -                                    | Oxolane <sup>1</sup> |
| 6          | 1-Propanol                                 | 71-23-8    | 775/775/3.88                              | Wiley9  | Alcohol, candy, pungent              | Alcohols             |
| 7          | Benzofuran,2,3-dihydro-                    | 496-16-2   | 686/686/8.53                              | Wiley9  | -                                    | Furans               |
| 8          | Bis(2-furfuryl) disulfide                  | 4437-20-1  | 730/730/28.59                             | Replib  | Roasted meaty, coffee                | Furans               |
| 9          | Pyrazine,2-methyl-6-(1-propenyl)-, (E)     | 18217-81-7 | 778/778/46.43                             | Mainlib | -                                    | Pyrazines            |
| 10         | 5-Hydroxymethylfurfural                    | 67-47-0    | 729/729/28.02                             | Replib  | -                                    | Furans               |
| 11*        | Caffeine                                   | 58-08-2    | 801/801/93.17                             | Wiley9  | Coffee                               | Methylxanthines      |
| 12         | Thiazole,4-methyl                          | 693-95-8   | 822/822/60.31                             | Wiley 9 | Green, nut, roasted meat             | Thiazoles            |
| 13         | Pyrazine,2-ethenyl-5-methyl                | 13925-08-1 | 875/875/54.17                             | Mainlib | Savory                               | Pyrazines            |
| 14         | 5-methyl-5H-6,7-dihydrocyclo-pentapyrazine | 23747-48-0 | 898/898/27.07                             | Wiley9  | Nuts, peanuts, roast                 | Pyrazines            |
| 15*        | Caffeine                                   | 58-08-2    | 898/898/94.68                             | Wiley9  | coffee                               | Methylxanthines      |

\*In the data processing by the ChromTile software the caffeine peak was cut in two tiles.

<sup>1</sup> It also contains a primary amine group, <sup>2</sup> it also contains a ketone group.

|    |                            |            |               |         |                                  |                     |
|----|----------------------------|------------|---------------|---------|----------------------------------|---------------------|
| 16 | Pyrazine, trimethyl        | 14667-55-1 | 938/938/98.18 | Mainlib | Coca, earth, must, potato, roast | Pyrazines           |
| 17 | Ethanone,1-(2-furanyl)-    | 1192-62-7  | 957/957/86.87 | Wiley9  | Balsamic, cocoa, coffee          | Furans <sup>2</sup> |
| 18 | 1H-Benzotriazole,4-methyl- | 29878-31-7 | 859/859/30.42 | Wiley9  | -                                | Triazoles           |
| 19 | 2-Methoxy-4-vinylphenol    | 7786-61-0  | 887/887/61.69 | Mainlib | Clove, curry, spice              | Phenols             |
| 20 | 3-Acetyl-1-methylpyrrole   | 932-62-7   | 892/892/52.01 | Mainlib | Woody                            | Pyrroles            |

**Table S2.** The analytical conditions of HS-SPME-GC×GC-TOFMS.

|                               |                                                                                                                                          |
|-------------------------------|------------------------------------------------------------------------------------------------------------------------------------------|
| <b>HS-SPME condition</b>      |                                                                                                                                          |
| SPME fiber                    | 50/30 $\mu$ m DVB/CAR/PDMS                                                                                                               |
| Pre-condition temperature     | 250 $^{\circ}$ C                                                                                                                         |
| Pre-condition time            | 10 min                                                                                                                                   |
| Sample incubation temperature | 50 $^{\circ}$ C                                                                                                                          |
| Incubation time               | 40 min                                                                                                                                   |
| Agitator speed                | 250 rpm                                                                                                                                  |
| Agitator on time              | 10 s                                                                                                                                     |
| Agitator off time             | 2 s                                                                                                                                      |
| Fiber sample extraction time  | 60 min                                                                                                                                   |
| Sample desorb time            | 10 min                                                                                                                                   |
| Post-condition temperature    | 250 $^{\circ}$ C                                                                                                                         |
| Post-condition time           | 10 min                                                                                                                                   |
| <b>GC condition</b>           |                                                                                                                                          |
| Injector temperature          | 250 $^{\circ}$ C                                                                                                                         |
| Injector mode                 | Split                                                                                                                                    |
| Split ratio                   | 5 :1                                                                                                                                     |
| Oven temperature ramp         | 50 $^{\circ}$ C (1 min, 2 $^{\circ}$ C/min) 230 $^{\circ}$ C (50 $^{\circ}$ C/min) 250 $^{\circ}$ C (5 min)                              |
| Flow control mode             | Constant flow                                                                                                                            |
| Carrier gas flow rate         | 1 mL/min                                                                                                                                 |
| Column set                    | <sup>1</sup> D : StabilWax MS (30 m, 0.25 mm i.d., 0.25 $\mu$ m df)<br><sup>2</sup> D : Rxi-5Sil MS (1.3 m, 0.1 mm i.d., 0.1 $\mu$ m df) |
| <b>MS condition</b>           |                                                                                                                                          |
| Transferline temperature      | 250 $^{\circ}$ C                                                                                                                         |
| Ion source temperature        | 250 $^{\circ}$ C                                                                                                                         |
| Electron energy               | 70 eV                                                                                                                                    |
| Emission current              | 1 mA                                                                                                                                     |
| Mass range                    | $m/z$ 30 - 500                                                                                                                           |
| Acquisition time              | 3 min 20 s – 96 min 24 s                                                                                                                 |
| Solvent delay                 | 3 min 20 s                                                                                                                               |
| Acquisition rate              | 150 spectra/s                                                                                                                            |
| Extraction frequency          | 32 kHz                                                                                                                                   |
| <b>Modulator condition</b>    |                                                                                                                                          |
| Modulation period             | 2 s                                                                                                                                      |
| Injection duration            | 0.08 s                                                                                                                                   |

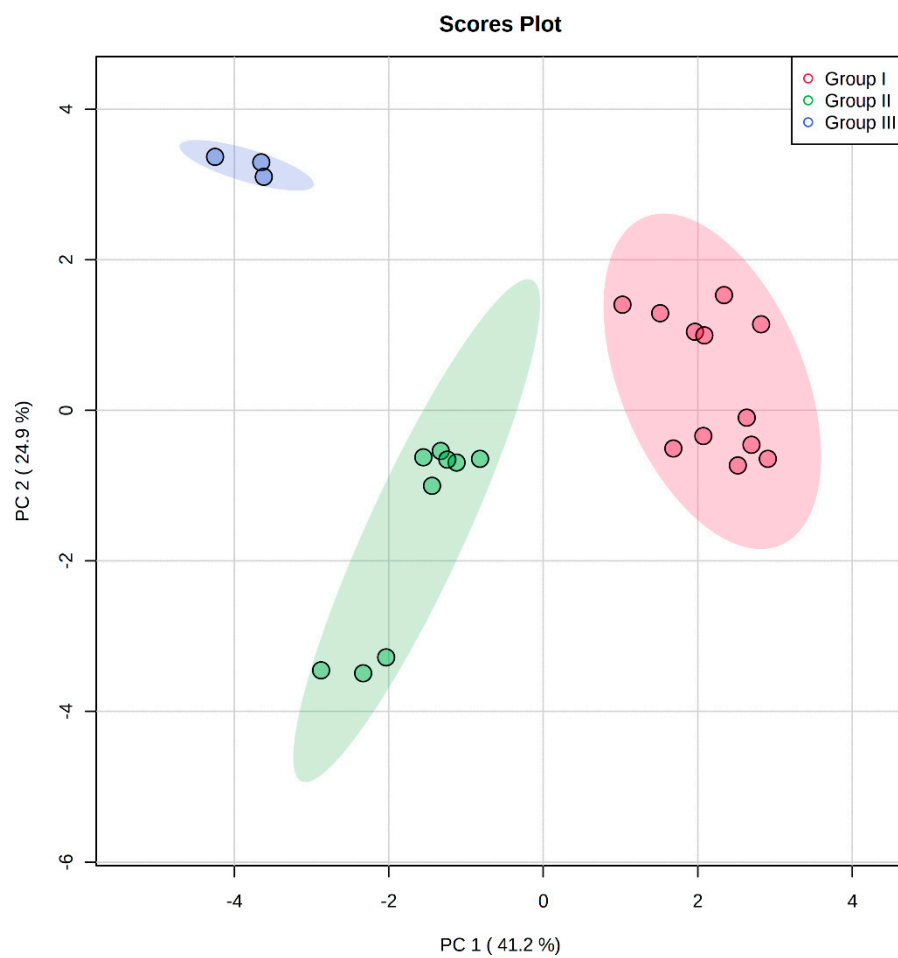

**Figure S1.** PCA score plots of the decaffeinated coffee samples.

Group I: D-VI, D-R, D-F and D-VO coffee samples.

Group II: D-I, D-DE and D-S coffee samples.

Group III: D-L coffee samples.

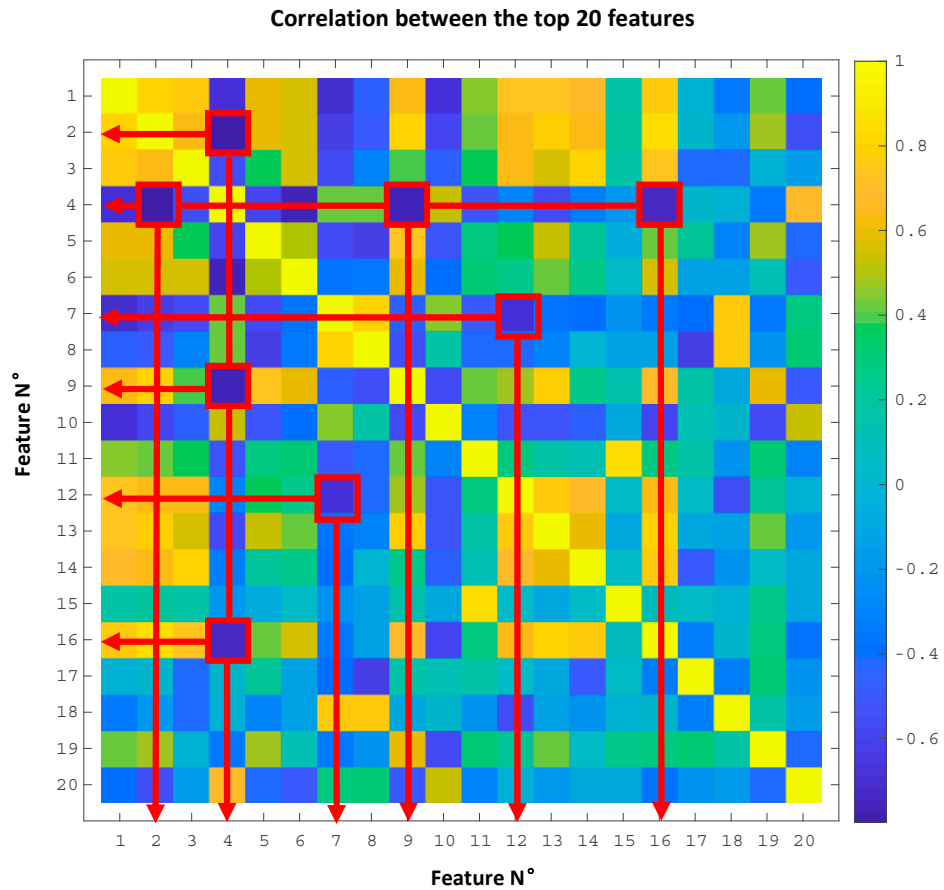

**Figure S2.** The correlation matrix between the top 20 features.

$r = -0.72$  between feature N°4 and N°16

$r = -0.76$  between feature N°4 and feature N°9

$r = -0.80$  between feature N°4 and feature N°2

$r = -0.67$  between feature N°7 and feature N°12

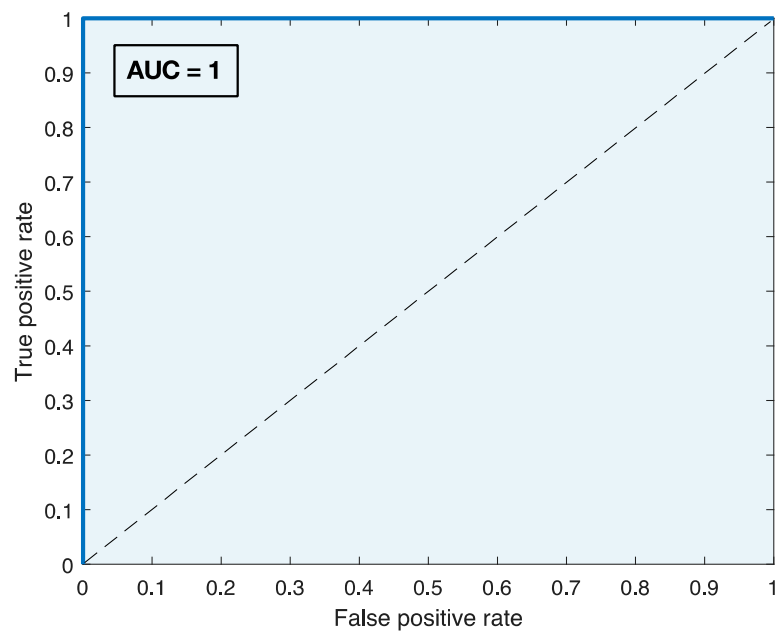

**Figure S3.** The ROC curve of the validation set ( $n=30$ ) generated by using the Random forest algorithm.

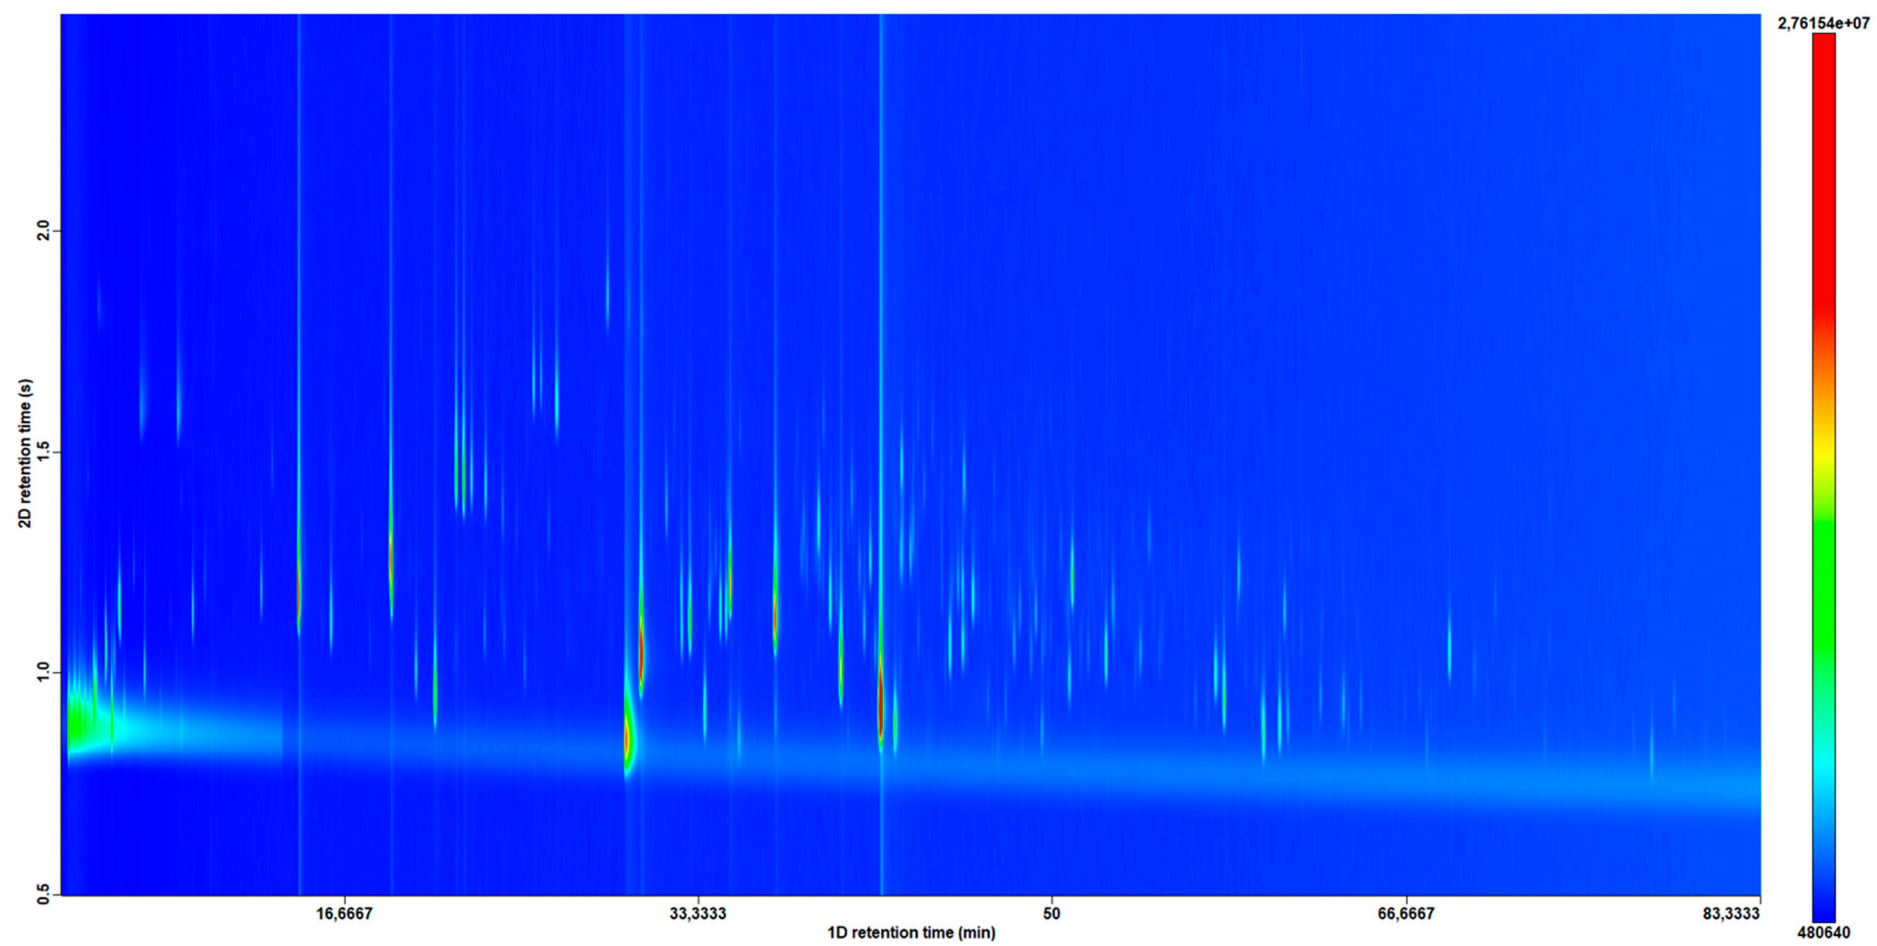

**Figure S4.** The 2D chromatogram of the coffee sample R-R.
